# Supplementary material for: Platelet backpacking nanoparticles based on bacterial outer membrane vesicles enhanced photothermal-immune anti-tumor therapy
Source: Royal Society of Chemistry journal article supplement (doi:10.1039/d4nr02757d), 2024-12-02
Supplement: d4nr02757d1.pdf [file d4nr02757d1.pdf]

# Supplementary information

## Platelet backpacking nanoparticles based on bacterial outer membrane vesicles enhanced photothermal- immune anti-tumor therapy

Jiao He<sup>a</sup>, Jiayu Li<sup>a</sup>, Min Li<sup>a</sup>, Zhidi He<sup>a</sup>, Yunxia Ye<sup>a</sup>, Jiaxin Li<sup>a</sup>, Jingdong Rao<sup>b</sup>,  
Xin Zhao<sup>b</sup>, Man Li<sup>a\*</sup>, Qin He<sup>a\*</sup>

*a* Key Laboratory of Drug-Targeting and Drug Delivery System of the Education Ministry and Sichuan Province, Sichuan Engineering Laboratory for Plant-Sourced Drug and Sichuan Research Center for Drug Precision Industrial Technology, Sichuan University, West China School of Pharmacy, Sichuan University, Chengdu 610041, China.

*b* Department of Applied Biology and Chemical Technology, the Hong Kong Polytechnic University, Hung Hom, Kowloon, Hong Kong SAR, China.

\*Corresponding author

Tel: +86-28-85502532 Fax: +86-28-85502532

Postal code: 610041 Email: manli@scu.edu.cn; qinhe@scu.edu.cn

## Supplementary tables and figures:

|               | Size (nm)        | Zeta Potential (mV) | Particles concentration ( $\times 10^8 / \mu\text{g protein}$ ) |
|---------------|------------------|---------------------|-----------------------------------------------------------------|
| OMVs          | $150.2 \pm 0.97$ | $-27.38 \pm 0.83$   | $3.614 \pm 0.2$                                                 |
| IR780-SLN     | $61.60 \pm 1.2$  | $6.96 \pm 1.8$      | —                                                               |
| IR780-SLN@O-P | $82.46 \pm 0.5$  | $-28.57 \pm 0.76$   | —                                                               |

**Table S1** Particle size and zeta potential of OMVs and prepared nanoparticles. (n = 3, mean  $\pm$  SD)

|               | EE (%)               |
|---------------|----------------------|
| IR780-SLN     | $87.59\% \pm 3.0\%$  |
| IR780-SLN@O-P | $89.52\% \pm 0.19\%$ |

**Table S2** Encapsulation efficiency (EE) of IR780. (n = 3, mean  $\pm$  SD)

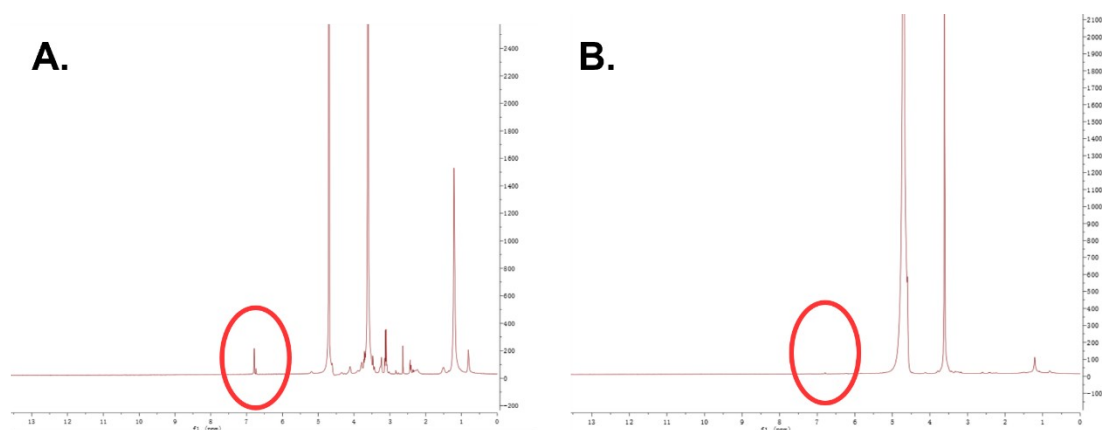

**Fig S1**  $^1\text{H}$  NMR spectrum (**A.**) the reactant DSPE-PEG<sub>2000</sub>-Mal, (**B.**) the product PSN-DP. (Red circles indicate characteristic peak locations)

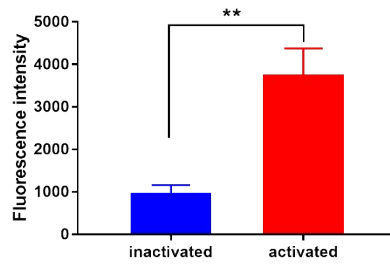

**Fig S2** Changes of CD62P expression in platelets before and after activation. (n = 3, mean  $\pm$  SD, \*\*p < 0.01)

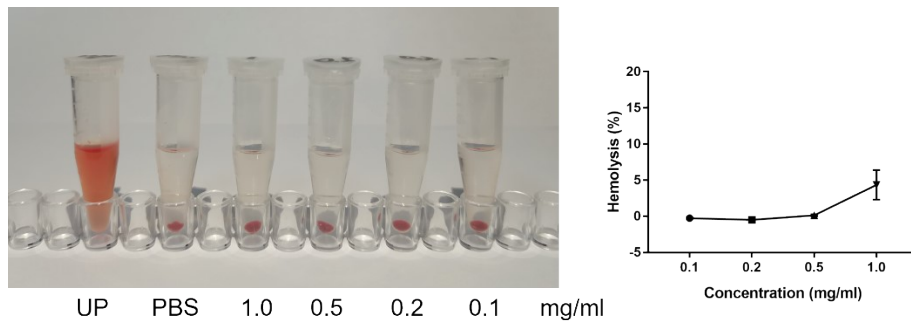

**Fig S3** Blood compatibility test of SLN@O-P nanoparticles. (incubated with 2% red blood cell suspension, n = 3, mean  $\pm$  SD)

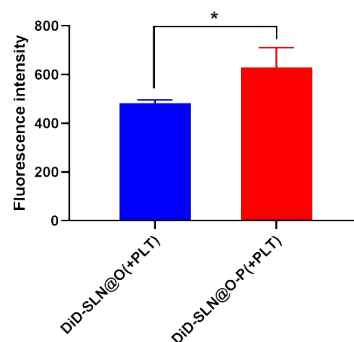

**Fig S4** Flow cytometry data of SLN@O and SLN@O-P nanoparticles uptaken by 4T1 cells after pre-incubation with activated platelets. (Nanoparticles labeled with fluorescent dye DiD) (n = 3, mean  $\pm$  SD, \*p < 0.05)

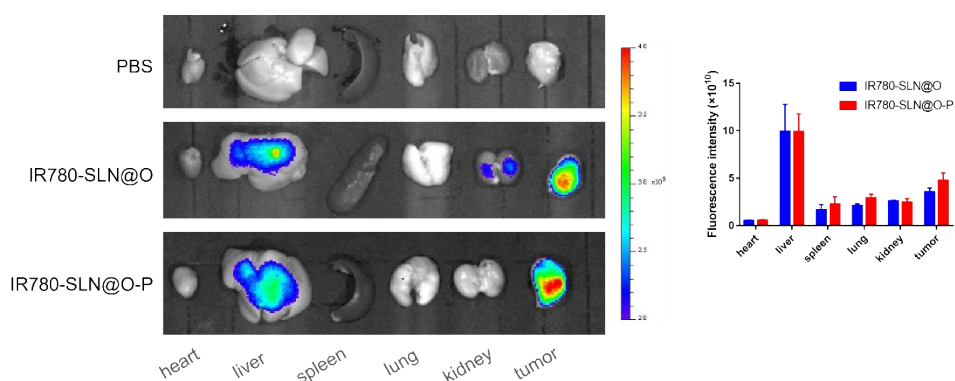

**Fig S5** Images of major organs and tumors *ex vivo* and semi-quantitative statistics of fluorescence intensity after 24 hours. (n = 3, mean  $\pm$  SD)

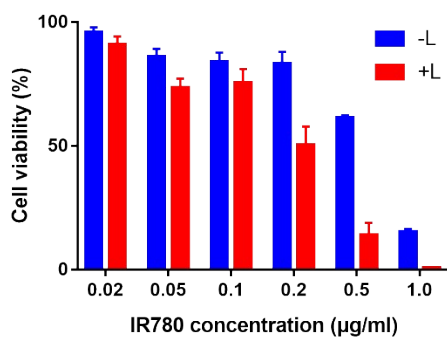

**Fig S6** Cytotoxicity of free IR780 to 4T1 cells. (+L means laser irradiation, -L means without. n = 3, mean  $\pm$  SD)

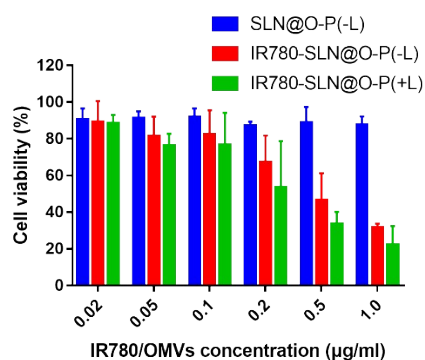

**Fig S7** Cytotoxicity of nanoparticles (IR780-SLN@O-P and SLN@O-P) to 4T1 cells. (+L means laser irradiation, -L means without. n = 3, mean  $\pm$  SD)

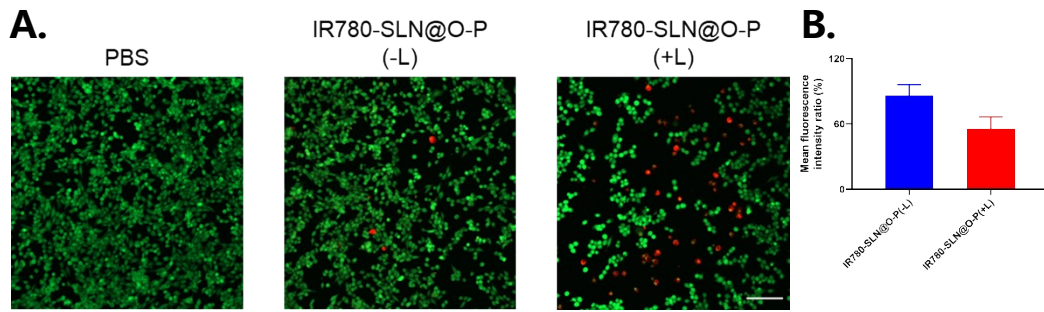

**Fig S8 (A.)** CLSM images of 4T1 cell activity affected by IR780-SLN@O-P NPs with or without laser irradiation. (Green fluorescence of calcein-AM labeled living cells and red fluorescence of Propidium Iodide labeled dead cells. Scale bar: 100  $\mu$ m) **(B.)** Semi-quantitative statistics of fluorescence intensity of live cells (green) compared with PBS group.

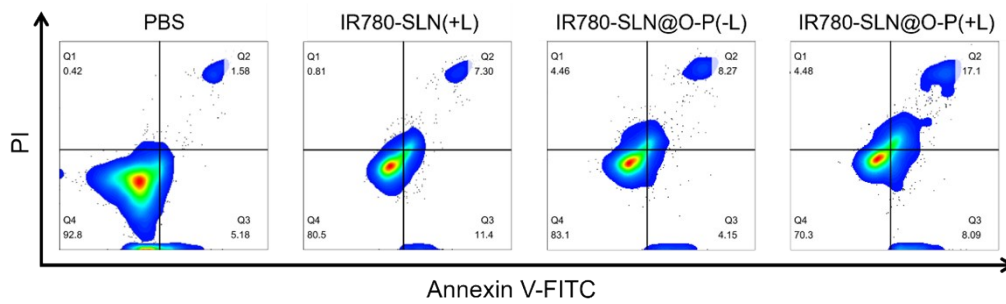

**Fig S9** Flow cytometry images of apoptosis after different nanoparticle treatment and laser irradiation.

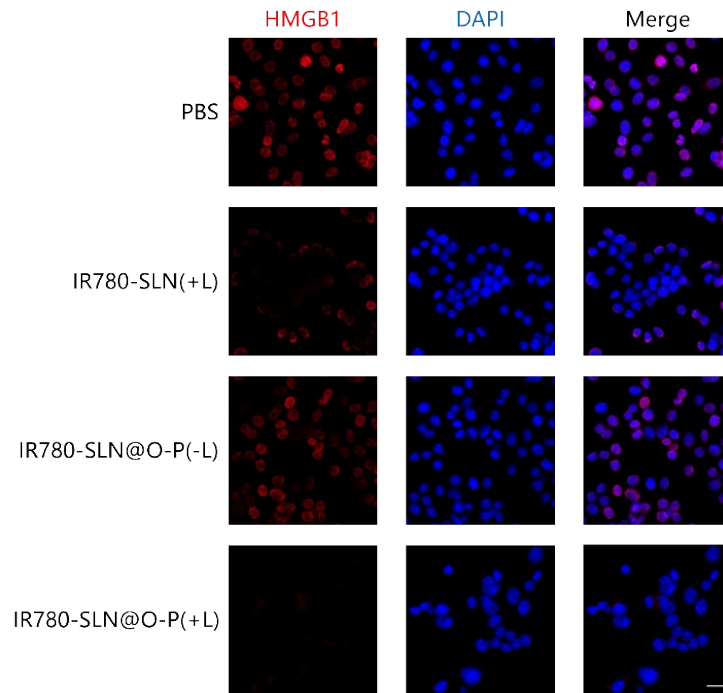

**Fig S10** CLSM images of HMGB1 released from 4T1 cells after different nanoparticle treatments and laser irradiation. (Red fluorescence AF647 labeled HMGB1. Scale bar: 20  $\mu\text{m}$ )

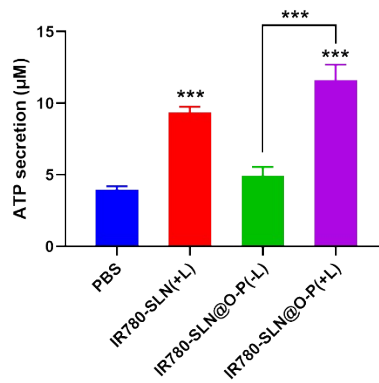

**Fig S11** ATP secretion in 4T1 cells after different nanoparticle treatments and laser irradiation. (n = 3, mean  $\pm$  SD, \*\*\*p < 0.001)

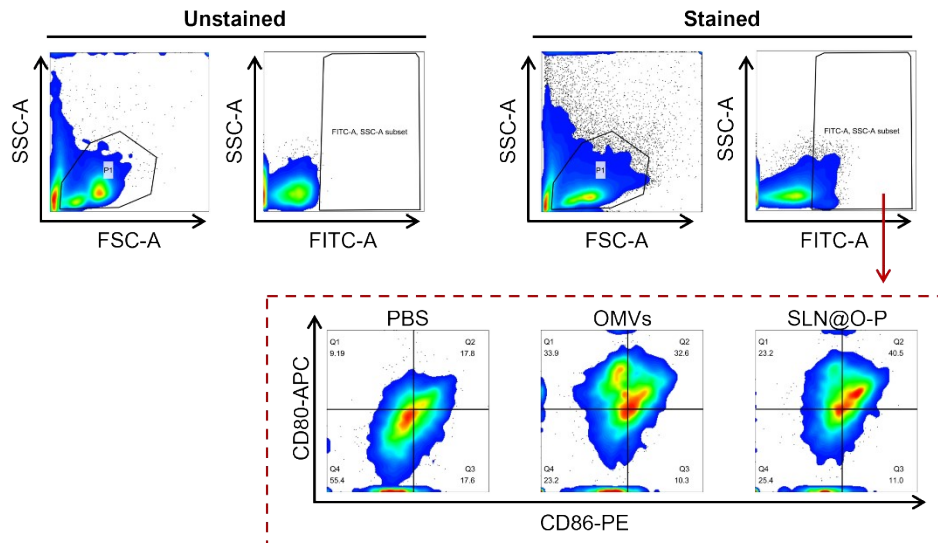

**Fig S12** Flow cytometry procedure and gating strategy for the detection of mature DCs in draining lymph nodes.

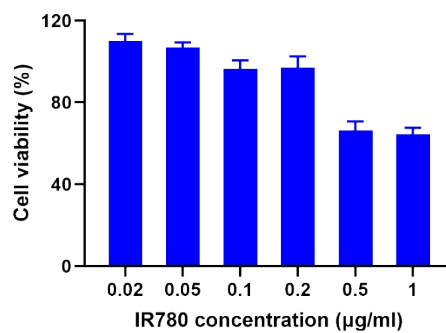

**Fig S13** Cytotoxicity of IR780-SLN@O-P nanoparticles to platelets. (n = 3, mean ± SD)

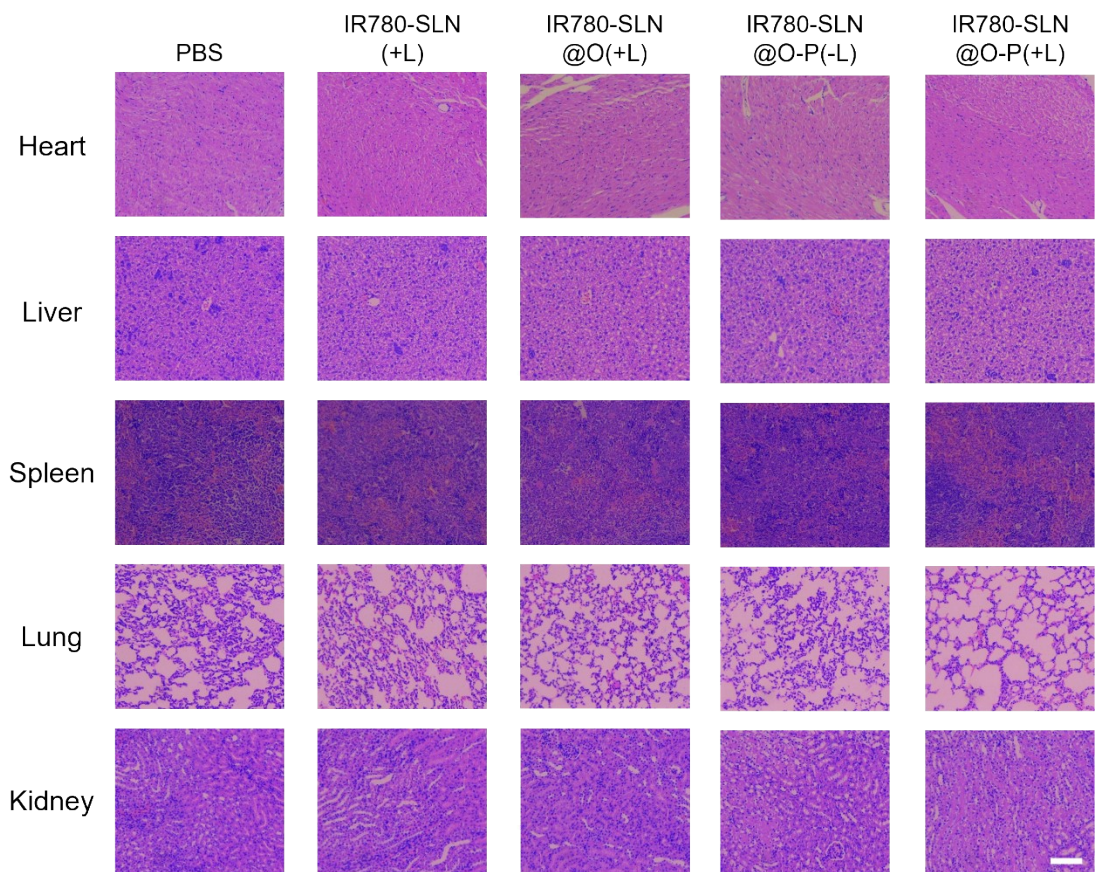

**Fig S14** HE stained section images of major organs from 4T1-bearing orthotopic tumor mice after treatment. (scale bar: 200 μm)

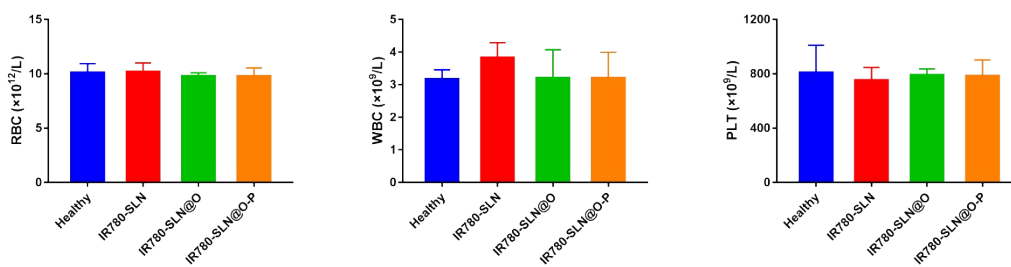

**Fig S15** Routine blood test of healthy mice after injection. (n = 3, mean ± SD)



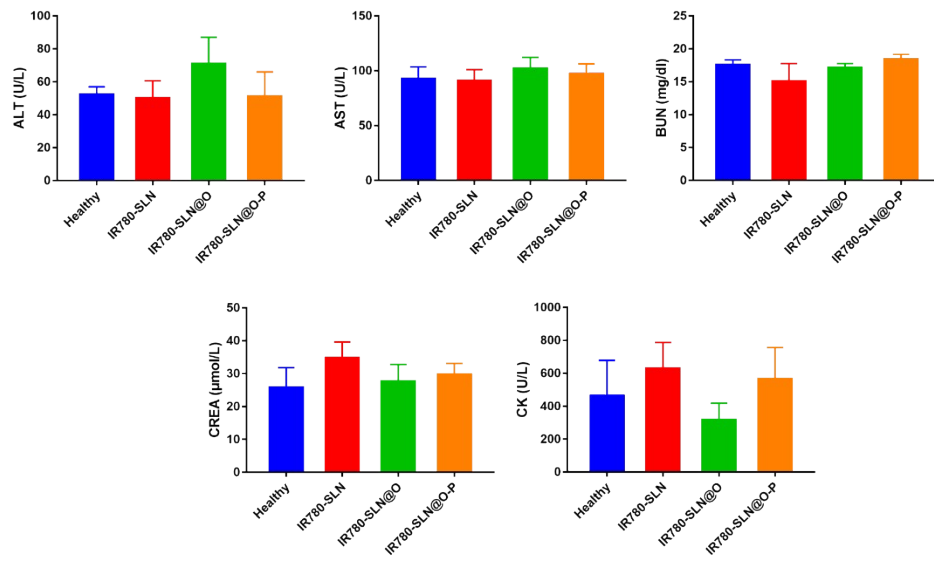

**Fig S16** Serum biochemical indices of healthy mice after injection. (n = 3, mean  $\pm$  SD)
